# Supplementary material for: TAK-676: A Novel Stimulator of Interferon Genes (STING) Agonist Promoting Durable IFN-dependent Antitumor Immunity in Preclinical Studies
Source: Cancer Res Commun. 2022 Jun 23;2(6):489–502. doi: 10.1158/2767-9764.CRC-21-0161 (PMC10010323; doi:10.1158/2767-9764.CRC-21-0161)
Supplement: Supplementary Figures S1-S5 — Supplementary figures: Supplementary Figure 1 shows cell viability of human monocyte-derived dendric cells and mouse bone marrow dendritic cells. Supplementary Figure 2 shows mean plasma and tumor concentration-time curves of TAK-676 in BALB/C mice (A20 syngeneic tumors). Supplementary Figure 3 shows percentage body weight change in BALB/C mice (CT26.WT and A20 syngeneic tumors). Supplementary Figure 4 shows percentage body weight change in STING-deficient Goldenticket mice (STING WT and B16F10 syngeneic tumors). Supplementary Figure 5 shows cytokine expression in A20 tumor-bearing mice (plasma and tumor). [file crc-21-0161-s02.docx]

**TITLE:** TAK-676: A Novel Stimulator of Interferon Genes (STING) Agonist Promoting Durable Interferon-Dependent Anti-Tumor Immunity in Preclinical Studies

**Authors:**

Elizabeth Carideo Cunniff1*, Yosuke Sato1*, Doanh Mai1*, Vicky A. Appleman1, Shinji Iwasaki2, Vihren Kolev1, Atsushi Matsuda2, Judy Shi1, Michiyo Mochizuki2, Masato Yoshikawa2, Jian Huang1, Luhua Shen1, Satyajeet Haridas1, Vaishali Shinde1, Chris Gemski1, Emily R. Roberts1, Omid Ghasemi1†, Hojjat Bazzazi1‡, Saurabh Menon1, Tary Traore1§, Pu Shi1¶, Tennille D. Thelen1**, Joseph Conlon1††, Adnan O. Abu-Yousif1, Christopher Arendt1, Michael H. Shaw1, and Masanori Okaniwa1

*Authors contributed equally to this manuscript

**Affiliations:**

1Takeda Development Center Americas, Inc. (TDCA), Lexington, MA, USA

2Takeda Pharmaceutical Company, Ltd., Fujisawa, Kanagawa, Japan

†Current affiliation: Invicro, LLC, Needham, MA, USA

‡Current affiliation: Cytomx Therapeutics, South San Francisco, CA, USA

§Current affiliation: TScan Therapeutics, Waltham, MA, USA

¶Current affiliation: BeiGene, Cambridge, MA, USA

**Current affiliation: Atara Biotherapeutics, Inc., South San Francisco, CA, USA

††Current affiliation: Pfizer, Inflammation and Immunology, Cambridge, MA, USA

**Corresponding authors:**

Michael H. Shaw

Takeda Development Center Americas, Inc. (TDCA), 95 Hayden Avenue, Lexington, MA 02421, USA

Email: [michael.shaw2@takeda.com](mailto:michael.shaw2@takeda.com)

Phone: +1 (617) 761-6834

Masanori Okaniwa

Takeda Development Center Americas, Inc. (TDCA), 95 Hayden Avenue, Lexington, MA 02421, USA

Email: [Masanori.Okaniwa2@takeda.com](mailto:Masanori.Okaniwa2@takeda.com)

Phone: +1 (617) 444-1596

**Authors’ Disclosures**

YS, ECC, DM, VAA, SI, VK, AM, JS, MM, MY, JH, LS, SH, VS, CG, ERR, HB, SM, TT, PS, JC, AOA-Y, CWA, MHS, MO disclose employment with Takeda. OG discloses previous employment with Takeda and current employment with Invicro, LLC. TDT discloses previous employment with Takeda and current employment with Atara Biotherapeutics, Inc.

**SUPPLEMENTAL FIGURES**

**Supplementary Figure 1.** Cell viability of **A,** human monocyte derived dendritic cells by TAK-676 at 24 hours from 5 donors, and **B,** of mouse bone marrow derived dendritic cells up to 72 hoursfrom 2 donors.


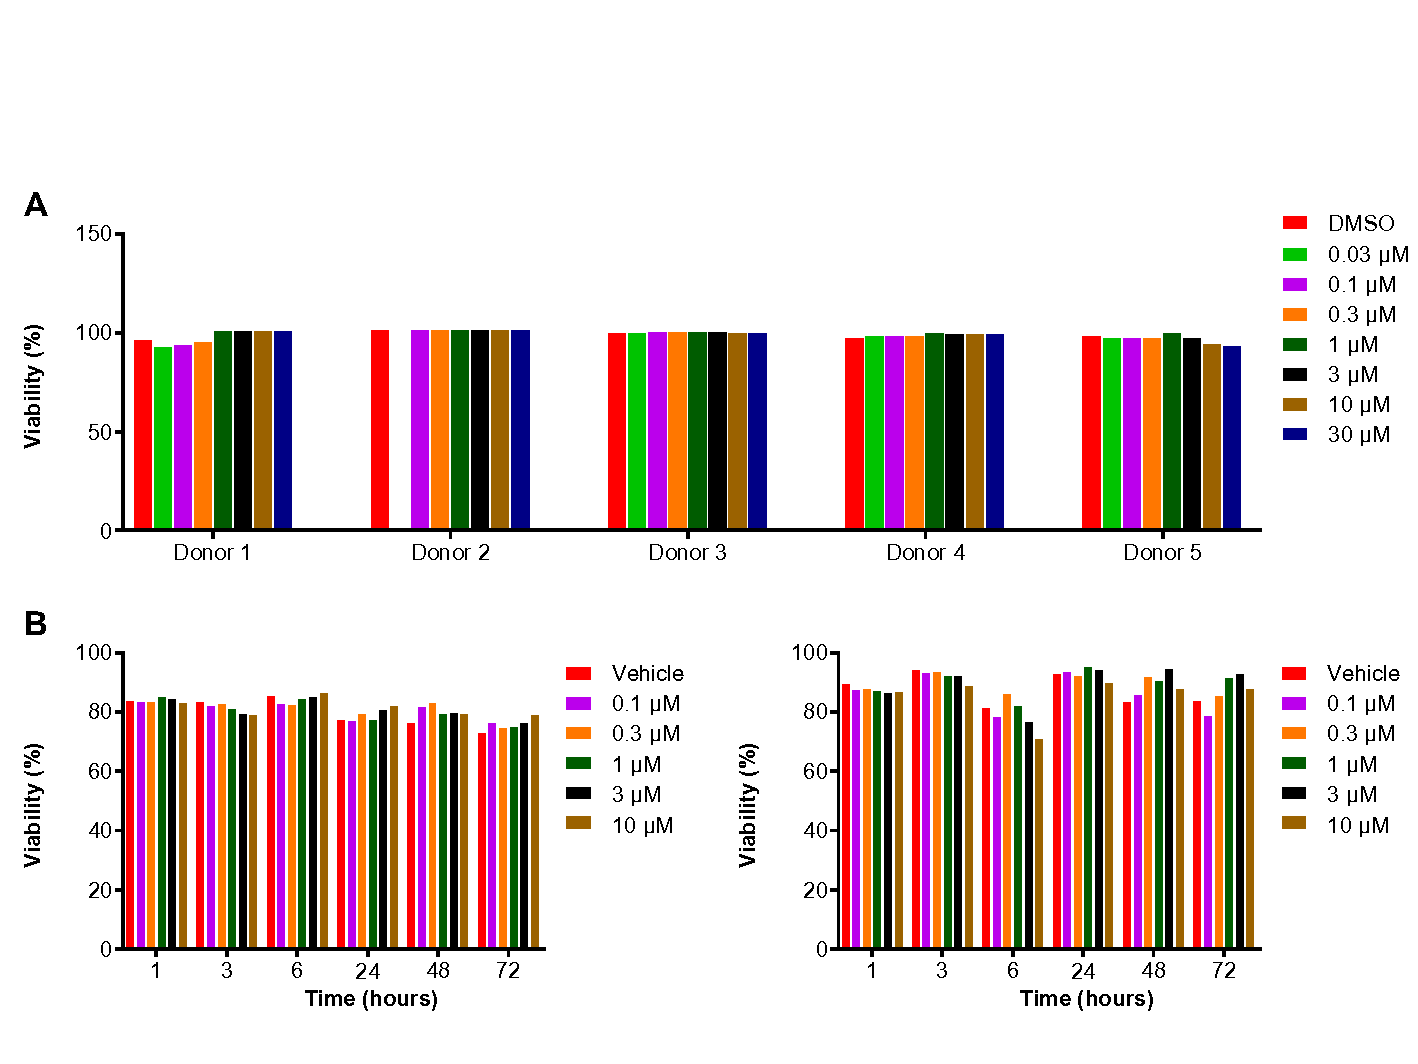


**Supplementary Figure 2.** Mean plasma (left) and tumor (right) concentration–time curves of TAK-676 in BALB/c mice bearing A20 tumors after intravenous administration of TAK-676at 0.025, 0.125, 0.25, 0.5, and 2 mg/kg.


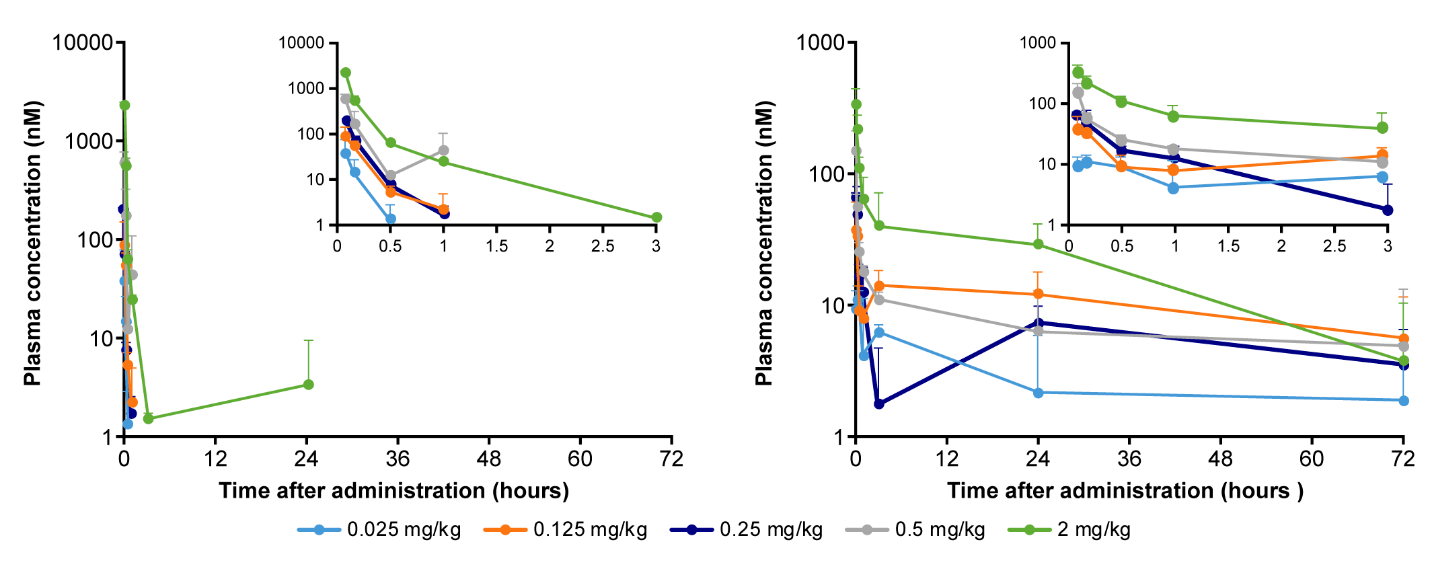


**Supplementary Figure 3.** Mean percent body weight change over time in: **A,** BALB/c mice bearing CT26.WT syngeneic tumors; **B,** BALB/c mice bearing A20 syngeneic tumors; All data shown are representative of at least three independent experiments.


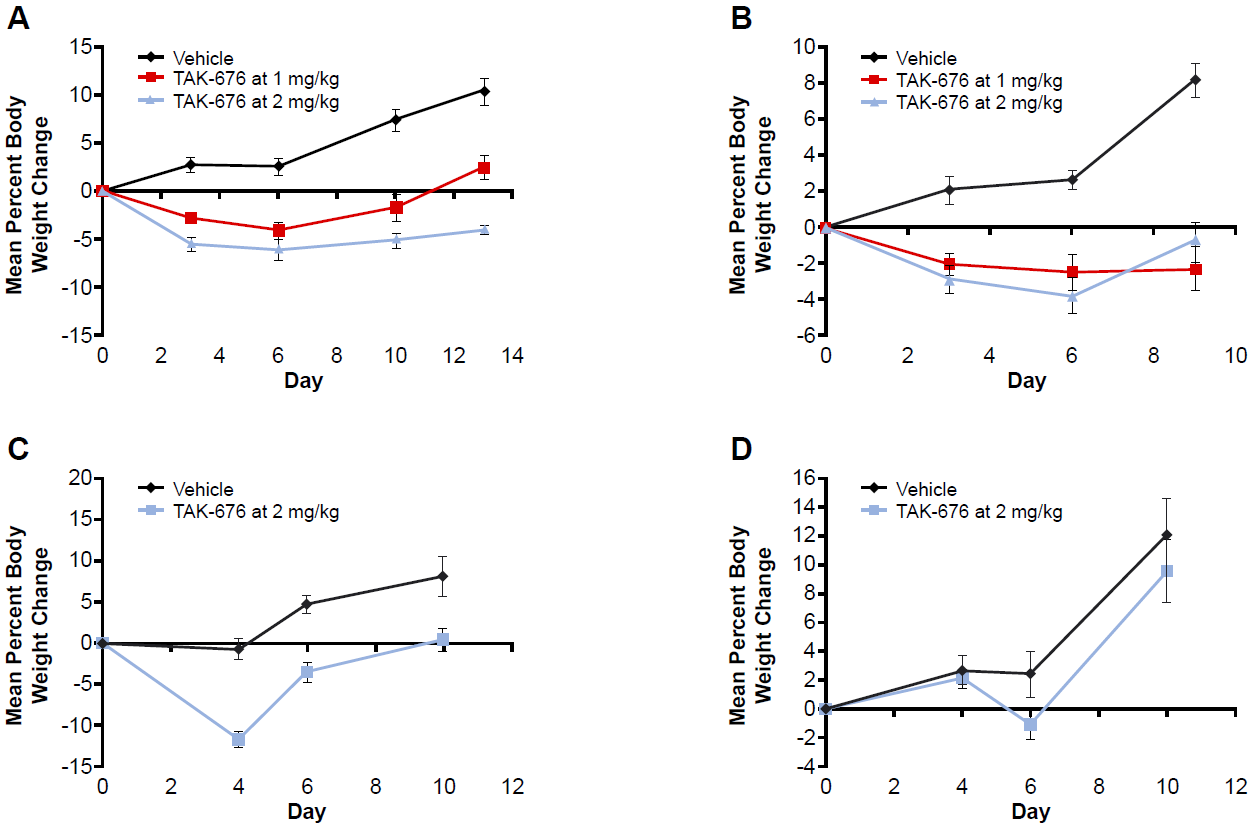


**Supplementary Figure 4.** Mean percent body weight change over time in WT or STING-deficient C57BL/6J-Tmem173gt/J (Goldenticket) mice bearing STING WT or deficient B16-F10 syngeneic tumors dosed with vehicle or TAK-676.


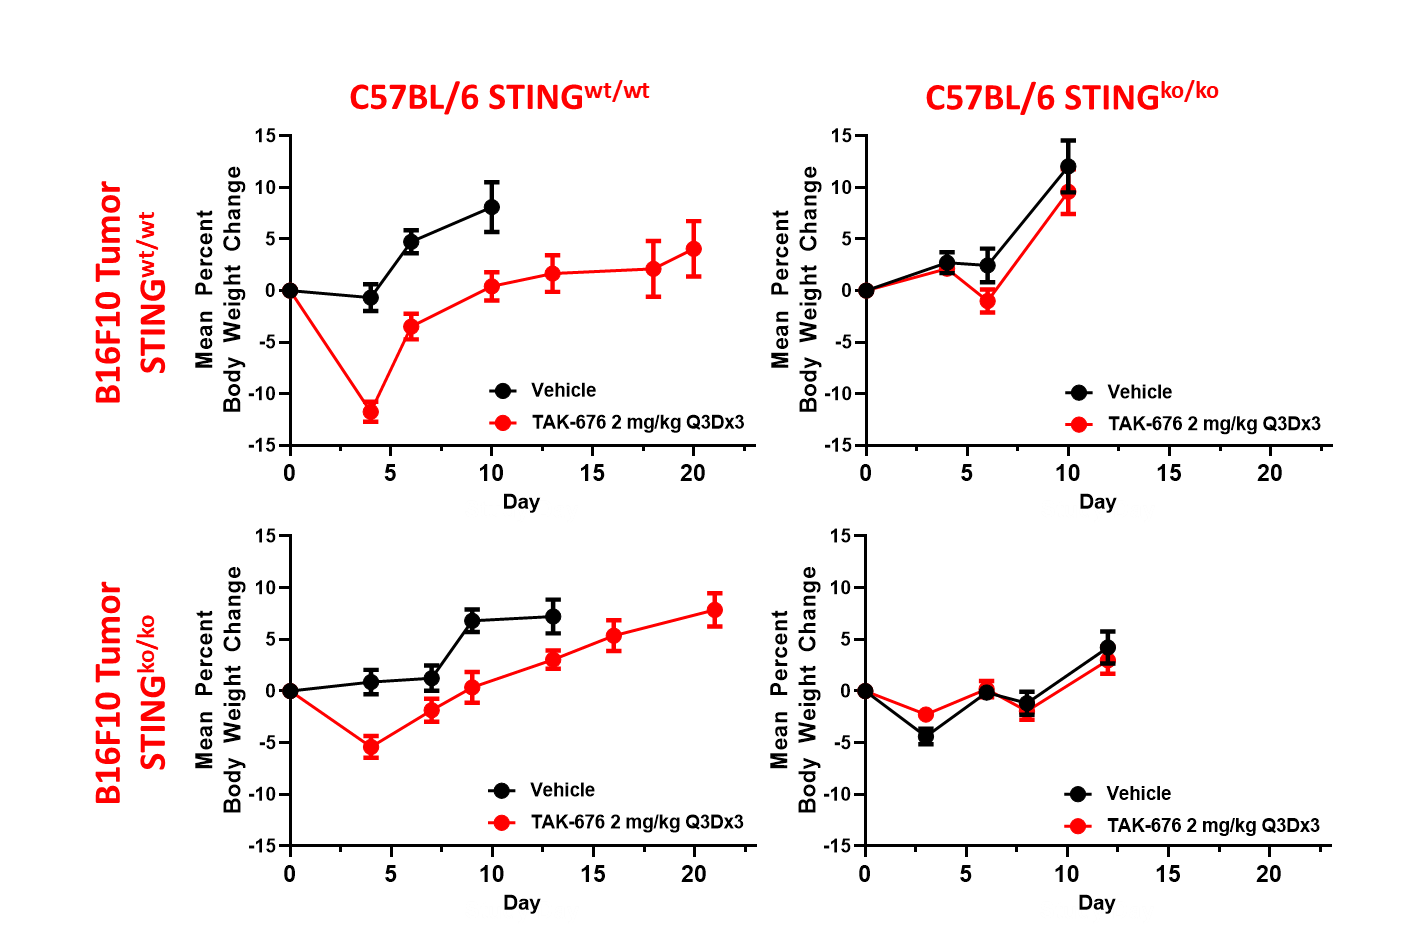


**Supplementary Figure 5**. Cytokine responses in plasma (left) and tumor (right) in A20 tumor-bearing mice following exposure to a single intravenous dose of vehicle or TAK-676: **A**, TNF-α; **B**, MCP-1; and **C**, IL-6. All data shown are representative of at least three independent experiments.


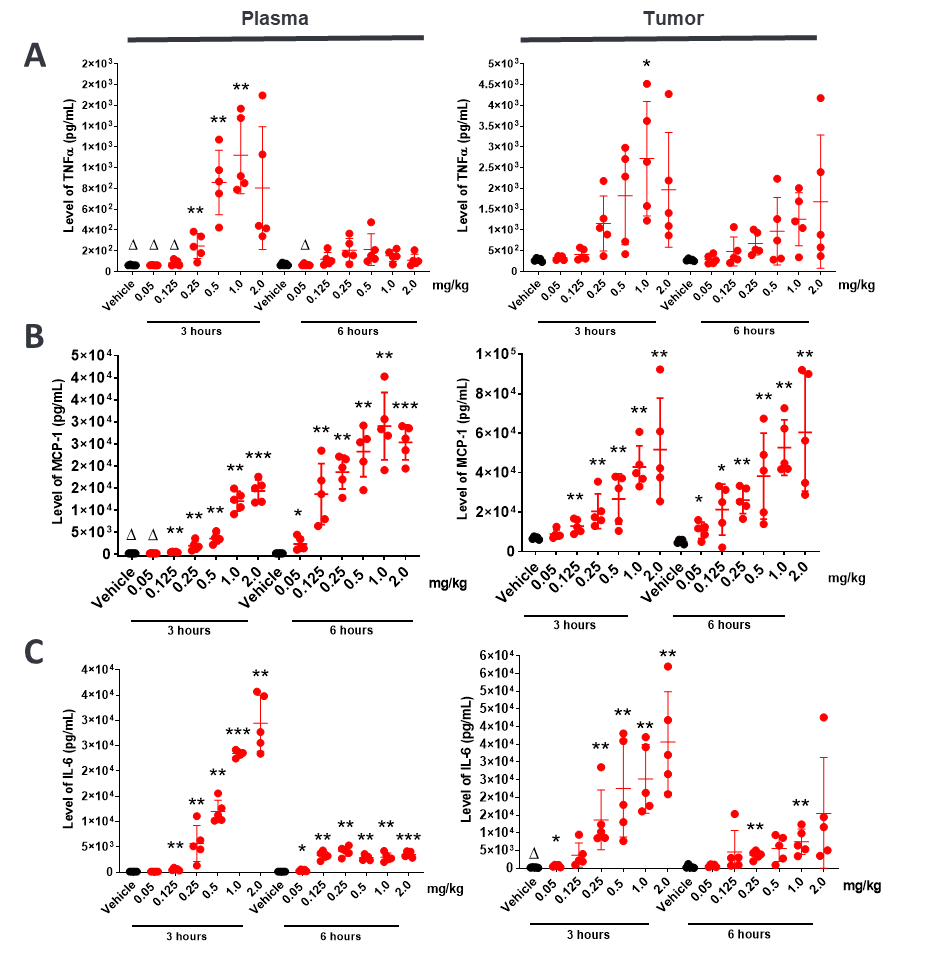
Δ: Indicates that some samples in this group had values below the lower limit of quantitation of the assay or had values extrapolated beyond the standard range.

*****: p value ≤ 0.05 relative to vehicle control.

**: p value ≤ 0.01 relative to vehicle control.

***: p value < 0.000001 relative to vehicle control.
